# Supplementary material
Source: publisher figshare collection journal article supplement (https://tandf.figshare.com/ndownloader/files/18026648)
Supplement: Supplementary file 1 [file 18026648]

**Appendix**

**Endpoint-oriented events**

1. a van driving down a country lane (towards a village/houses)

2. a woman walking across the parking lot (towards a car) event

3. a woman walking down an alley (towards a barrier)

4. a little boy walking along a path (towards a playground)

5. a man climbing up a ladder (towards a balcony)

6. a man crossing a street (towards a car)

7. two girls walking along a path (towards a house)

8. a girl on a horse riding (towards an entrance)

9. a mother and child walking through a park (towards a slide)

10. a car driving down a road (towards a petrol station)

**Endpoint-reached events**

1. a car driving into a garage

2. a girl entering the station

3. a van turning into a driveway

4. a man on a bicycle turning into a gateway

5. a woman is entering a supermarket

6. a dog running through the door of a building

7. a cat walking into the kitchen

8. a child going through a gate into a playground

9. a man walking into a church

10. a girl on a horse riding into a barn/stable
